# Supplementary material
Source: PubMed Central journal article supplement (PMC3381452)
Supplement: NIHMS370425-supplement-1_si_001.pdf [file NIHMS370425-supplement-1_si_001.pdf]

Supporting Information for

Factors that Control Catalytic Two- vs Four-Electron  
Reduction of Dioxygen by Copper Complexes

Shunichi Fukuzumi,<sup>\*,†,§</sup> Laleh Tahsini,<sup>†</sup> Yong-Min Lee,<sup>†</sup> Kei Ohkubo,<sup>§</sup> Wonwoo Nam,<sup>\*,†</sup> and  
Kenneth D. Karlin<sup>\*,†,‡</sup>

<sup>†</sup>*Department of Bioinspired Science, Ewha Womans University, Seoul 120-750, Korea,*

<sup>§</sup>*Department of Material and Life Science, Graduate School of Engineering, Osaka  
University, Suita, Osaka 565-0871, Japan,*

<sup>‡</sup>*Department of Chemistry, The Johns Hopkins University, Baltimore, MD 21218,  
USA,*

AUTHOR EMAIL ADDRESS [fukuzumi@chem.eng.osaka-u.ac.jp](mailto:fukuzumi@chem.eng.osaka-u.ac.jp), [karlin@jhu.edu](mailto:karlin@jhu.edu),  
[wnnam@ewha.ac.kr](mailto:wnnam@ewha.ac.kr)

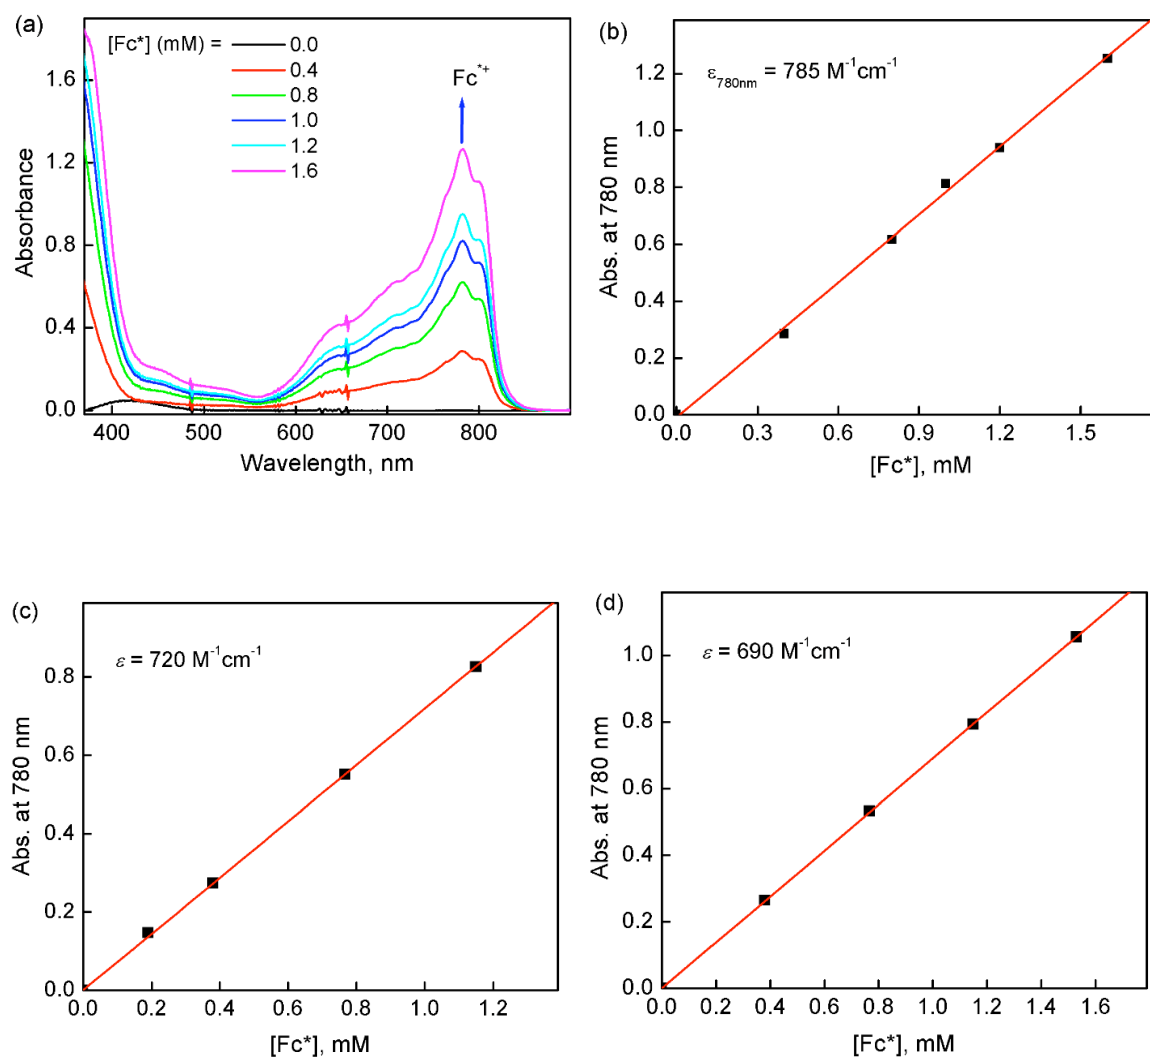

**Figure S1.** (a) Spectral titration for the formation of  $\text{Fc}^{*+}$  upon addition of  $\text{Fc}^*$  into the solution of excess amount of *p*-benzoquinone in the presence of HOTF (5.0 mM) in acetone at 193 K. (b, c, d) Plots of the absorbance at 780 nm due to  $\text{Fc}^{*+}$  generated from the reaction of  $\text{Fc}^*$  and excess amount of *p*-benzoquinone in the presence of HOTF (5.0 mM) vs. the concentration of  $\text{Fc}^*$  (b) (0.0 – 1.60 mM) at 193 K, (c) (0.0 – 1.15 mM) at 213 K and (d) (0.0 – 1.15 mM) at 223 K to determine the extinction coefficient of  $\text{Fc}^{*+}$  in acetone.

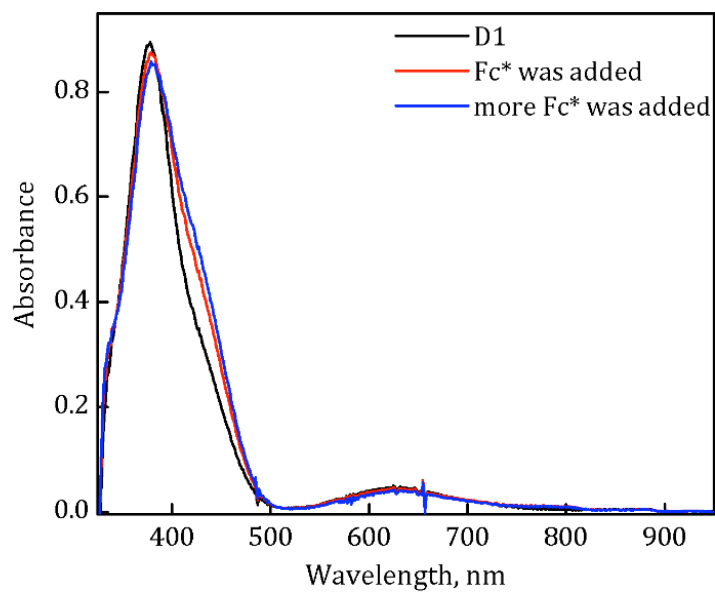

**Figure S2.** UV-visible spectra of **D1** (0.20 mM) (black line) and **D1** (0.20 mM) plus  $\text{Fc}^*$  (red line (1.0 mM) and blue line (2.0 mM)) in acetone at 223 K.

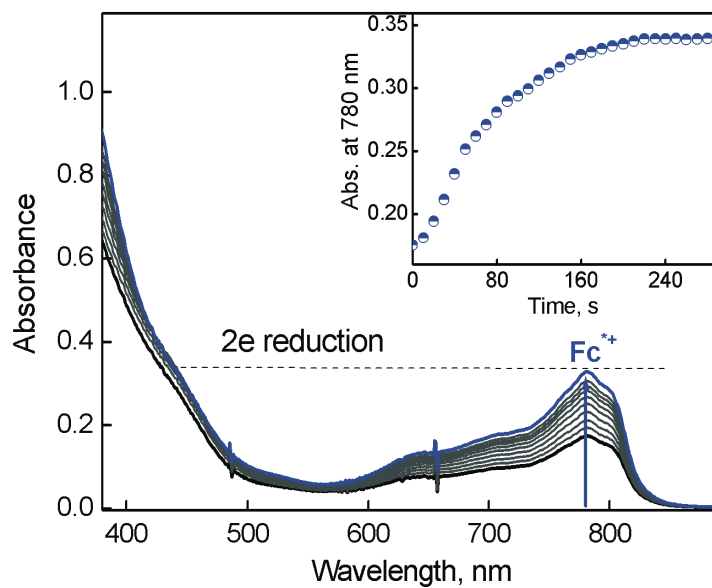

**Figure S3.** UV-vis spectral changes observed in the two-electron reduction of O<sub>2</sub> (0.22 mM) catalyzed by **D1** (0.10 mM) with Fc<sup>\*</sup> (2.0 mM) in the presence of HOTF (4.0 mM) in acetone at 223 K. Inset shows the time profile of the absorbance at 780 nm due to Fc<sup>\*+</sup>.

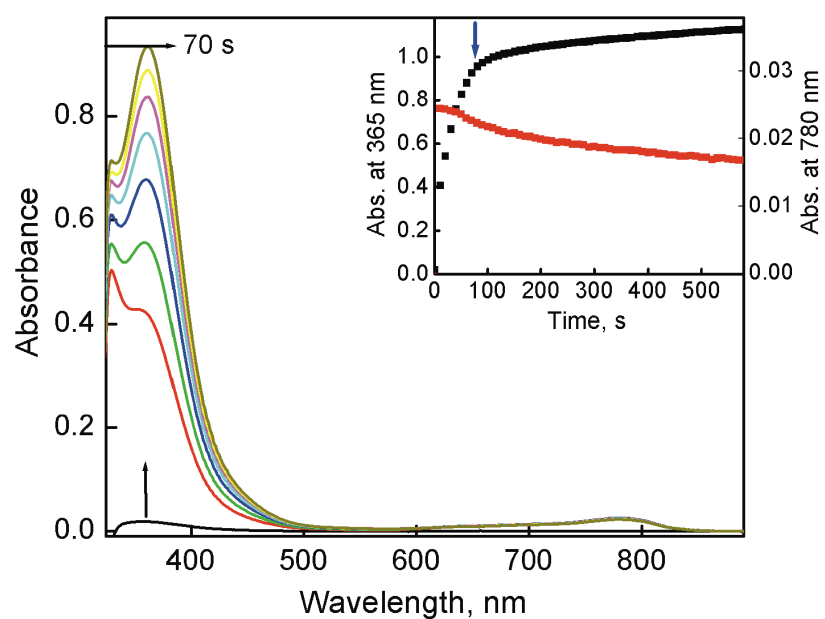

**Figure S4.** UV-vis spectral changes observed in the reaction of NaI (0.20 M) with the diluted ( $\times 15$ ) acetone solution of the products at 298 K after the complete catalytic reduction of  $O_2$  (11.0 mM) by **D1** (0.10 mM) with  $Fc^*$  (0.80 mM) in the presence of HOTF (2.0 mM) in acetone at 213 K.

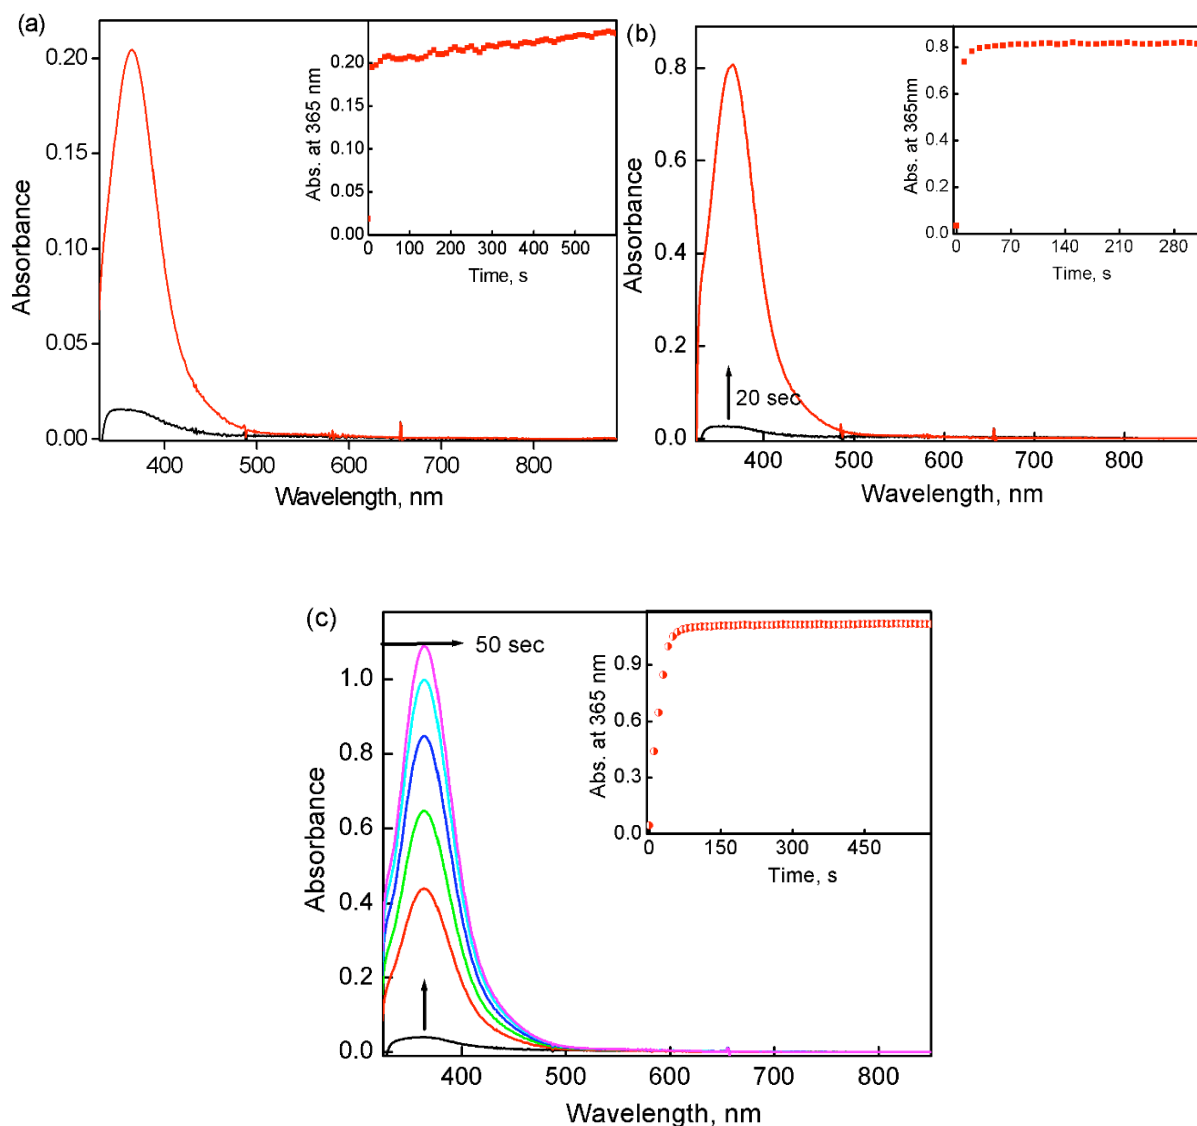

**Figure S5.** UV-visible spectral changes observed in the formation reaction of  $I_3^-$  upon addition of (a) an acetone solution containing **D1** ( $7.0 \mu\text{M}$ ) and HOTF ( $70 \mu\text{M}$ ) into NaI ( $0.20 \text{ M}$ ) in acetone at  $298 \text{ K}$ , (b) an acetone solution containing  $\text{H}_2\text{O}_2$  ( $33.0 \mu\text{M}$ ) into NaI ( $0.20 \text{ M}$ ) in acetone at  $298 \text{ K}$  and (c) an acetone solution containing  $\text{H}_2\text{O}_2$  ( $33.0 \mu\text{M}$ ), **D1** ( $7.0 \mu\text{M}$ ) and HOTF ( $70 \mu\text{M}$ ) mixed for  $1.5 \text{ h}$  into NaI ( $0.20 \text{ M}$ ) in acetone at  $298 \text{ K}$ .

Note: Comparing the absorbance of  $I_3^-$  at  $365 \text{ nm}$  in part c with that in part a and b clearly shows that exactly the same amount of  $I_3^-$  in the presence of **D1** (c) is produced as in the absence of **D1** in the reaction of  $\text{H}_2\text{O}_2$  and  $\text{I}^-$  (b). Moreover according to the time course of the formation of  $I_3^-$  the reaction of  $\text{H}_2\text{O}_2$  and  $\text{I}^-$  is decelerated by the presence of **D1** (part c).

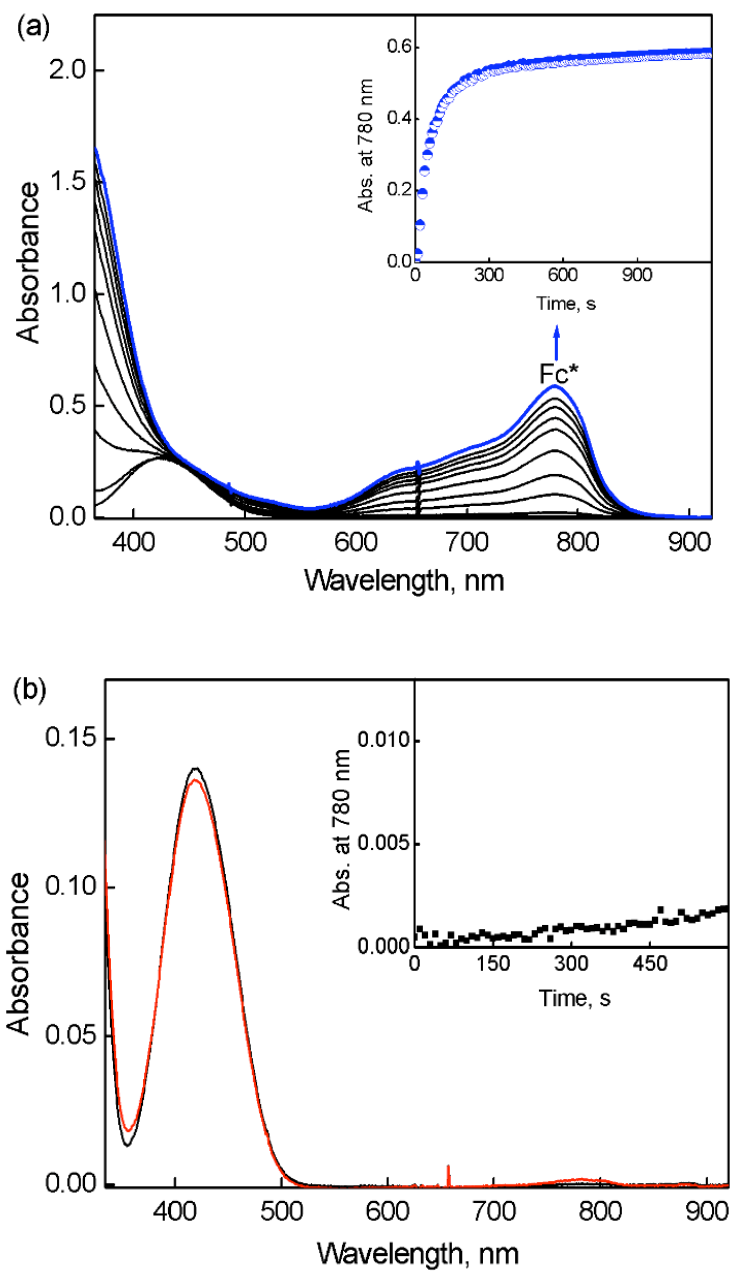

**Figure S6.** UV-vis spectral changes observed in the reaction of  $\text{Fc}^*$  (2.0 mM at 298 K (a) and 1.0 mM at 223 K (b) and  $\text{H}_2\text{O}_2$  (0.40 mM) in the presence of HOTF (4.0 mM) in acetone. Inset shows the time profile of the absorbance at 780 nm due to  $\text{Fc}^{*+}$ .

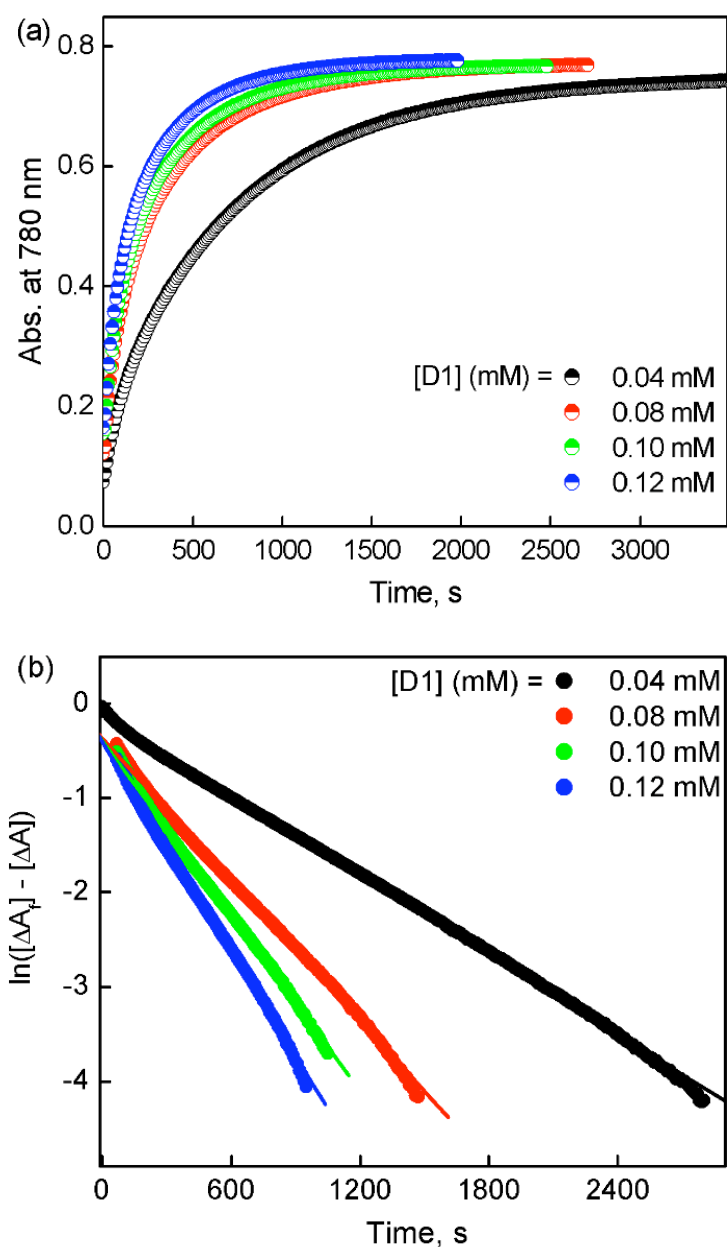

**Figure S7.** (a) Time profiles of the absorbance at 780 nm due to  $Fc^{*+}$  and (b) first-order plots of the formation of  $Fc^{*+}$  in the two-electron reduction of  $O_2$  catalyzed by **D1** (0.040 – 0.12 mM) with  $Fc^*$  (1.0 mM) in the presence of HOTf (3.0 mM) in  $O_2$ -saturated acetone ( $[O_2] = 11.0$  mM) at 223 K.



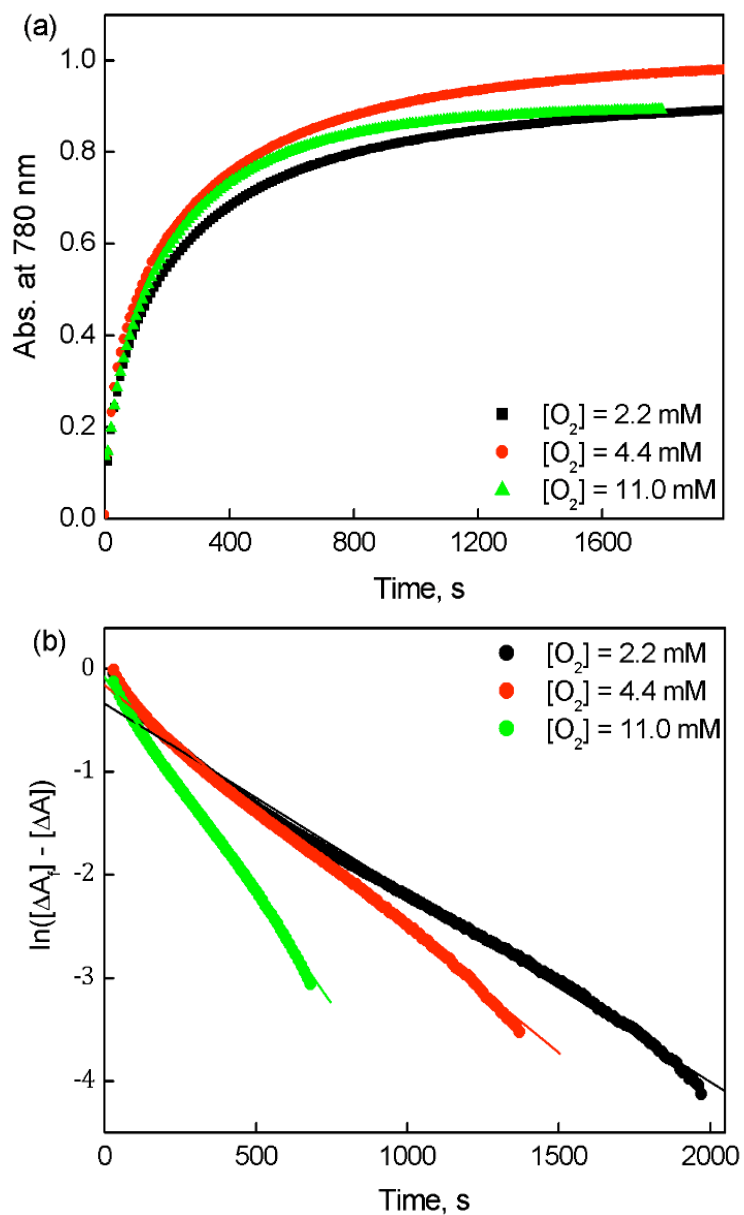

**Figure S8.** (a) Time profiles of the absorbance at 780 nm due to Fc<sup>\*+</sup> and (b) first-order plots of the formation of Fc<sup>\*+</sup> in the two-electron reduction of O<sub>2</sub> (2.2 – 11.0 mM) catalyzed by **D1** (0.10 mM) with Fc<sup>\*</sup> (1.4 mM) in the presence of HOTF (3.0 mM) in acetone at 223 K.

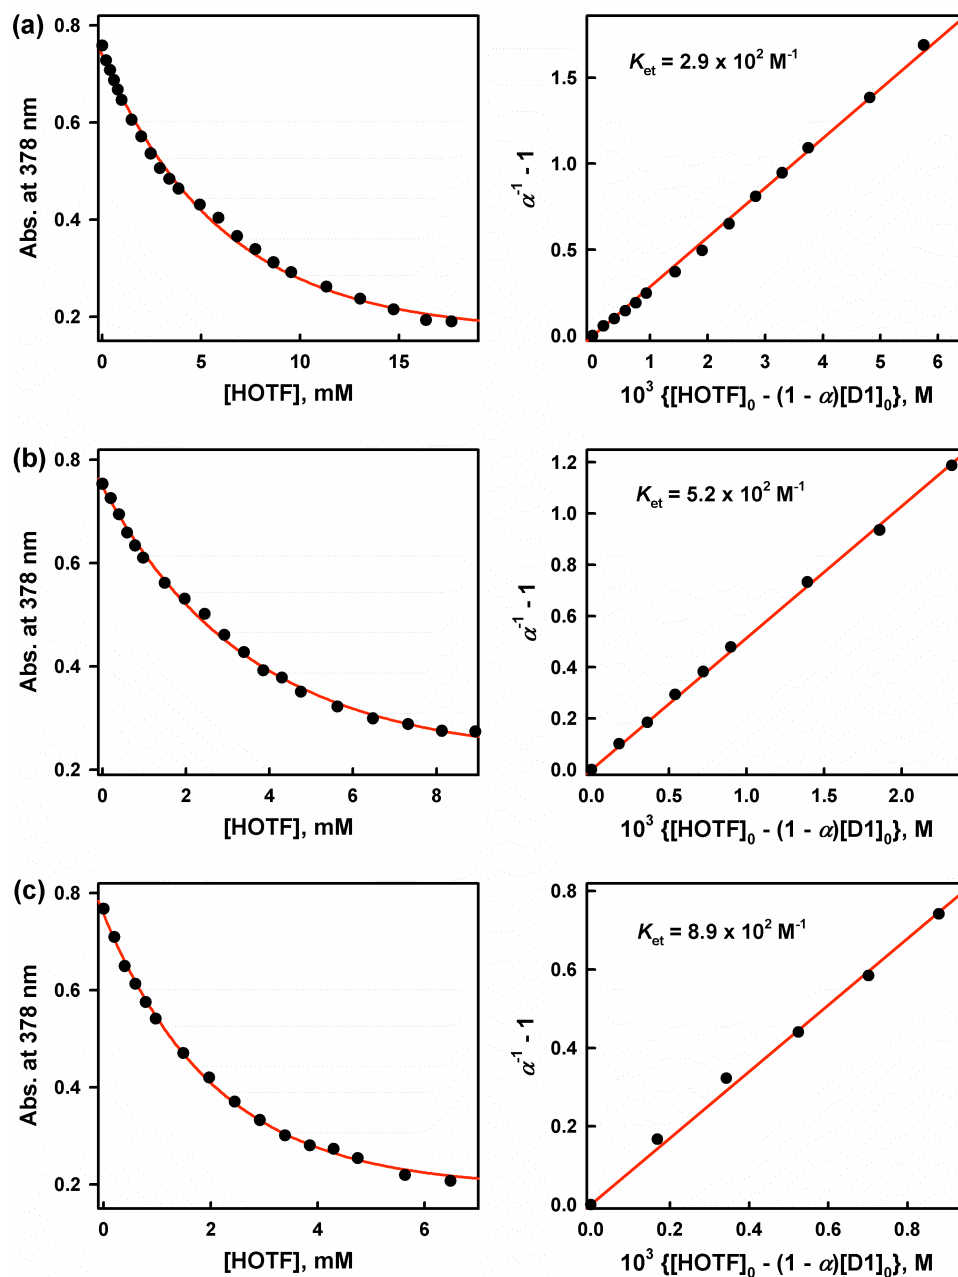

**Figure S9.** Absorbance changes of **D1** monitored at 378 nm upon addition of HOTF into the solution of **D1** (0.20 mM) in acetone at 273 K (a), 253 K (b) and 233 K (c) (left panels). Right panels show the plots of  $\alpha^{-1} - 1$  vs  $\{[\text{HOTF}]_0 - (1 - \alpha)[\text{D1}]_0\}$  to determine the equilibrium constants ( $K_{\text{eq}}$ ) in the protonation of **D1** in acetone, respectively.

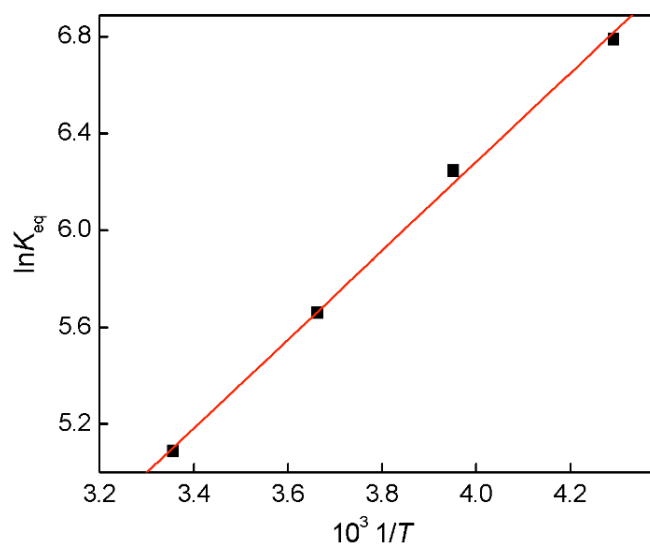

**Figure S10.** Van't Hoff plot to determine the enthalpy and entropy changes in the protonation of **D1** upon addition of HOTF (0.0 – 28.0 mM) into the solution of **D1** (0.20 mM) in acetone at 298K.

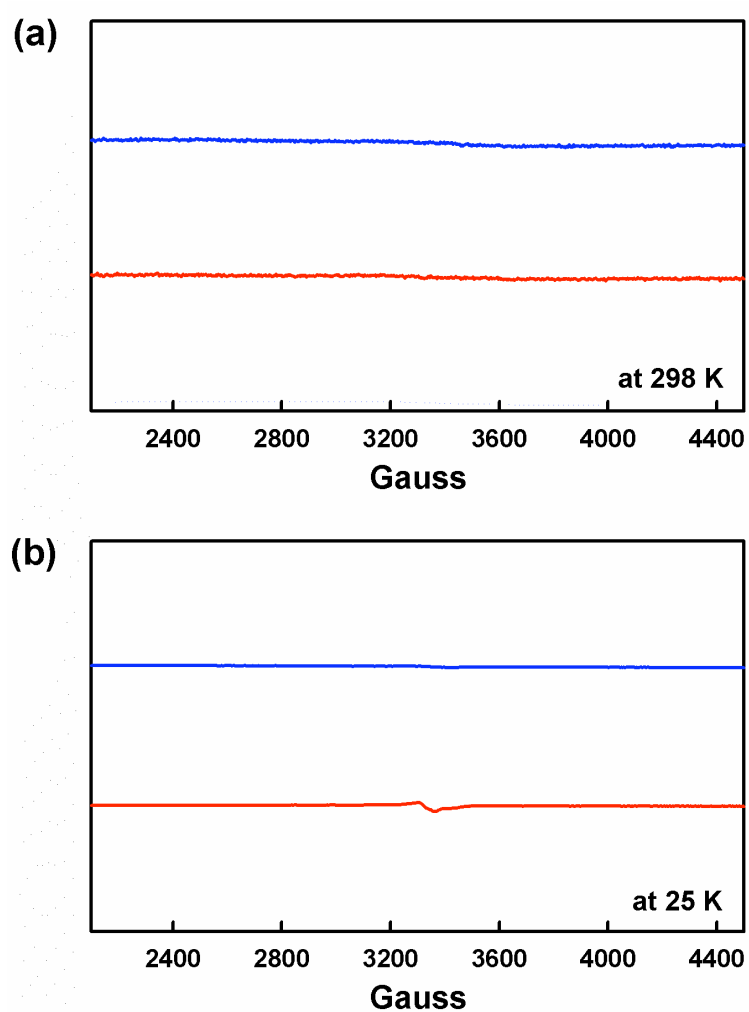

**Figure S11.** (a) X-band EPR spectra of **D1** (8.0 mM) in the absence (blue line) and presence (red line) of HOTF (40 mM) at 298 K in acetone. (b) X-band EPR spectra of **D1** (1.0 mM) in the absence (blue line) and presence (red line) of HOTF (5.0 mM) at 25 K in acetone.

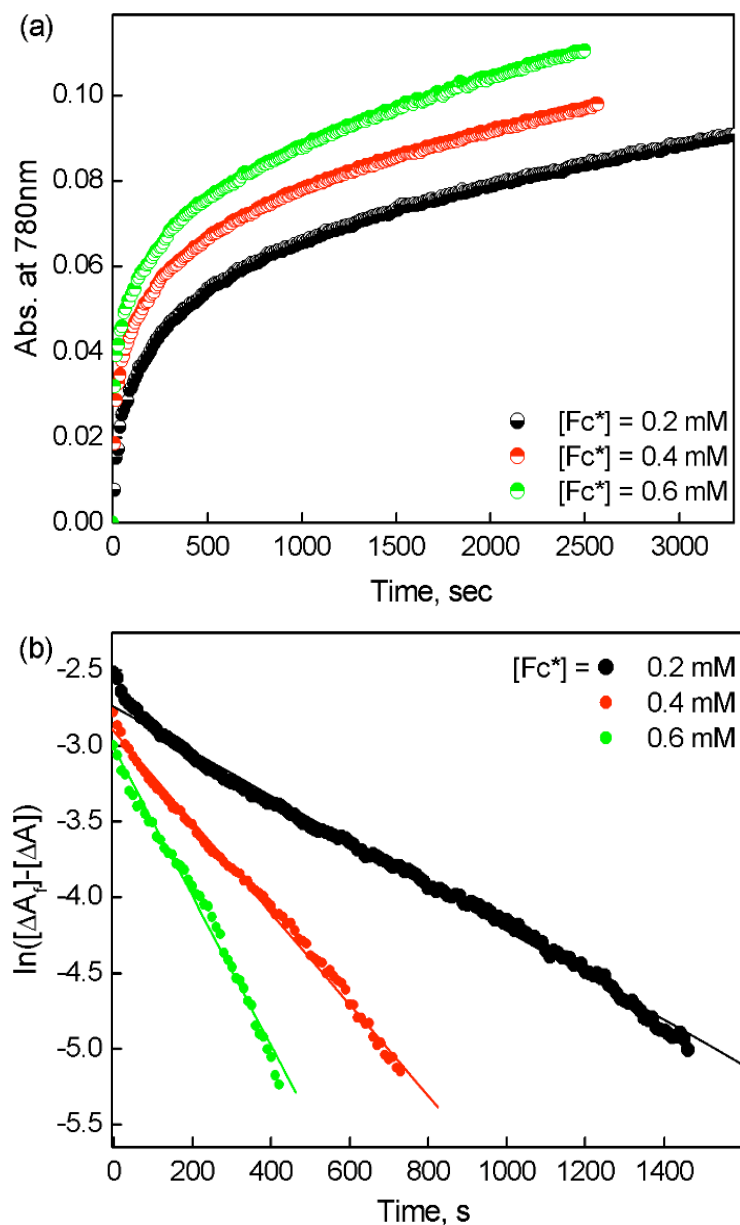

**Figure S12.** (a) Time profiles of the absorbance at 780 nm due to  $\text{Fc}^{*+}$  and (b) first-order plots of first electron transfer from  $\text{Fc}^*$  (0.20 mM (black), 0.40 mM (red) and 0.60 mM (green)) to  $\text{D1}$  (0.10 mM) in the presence of HOTF (3.0 mM) in acetone at 203 K.

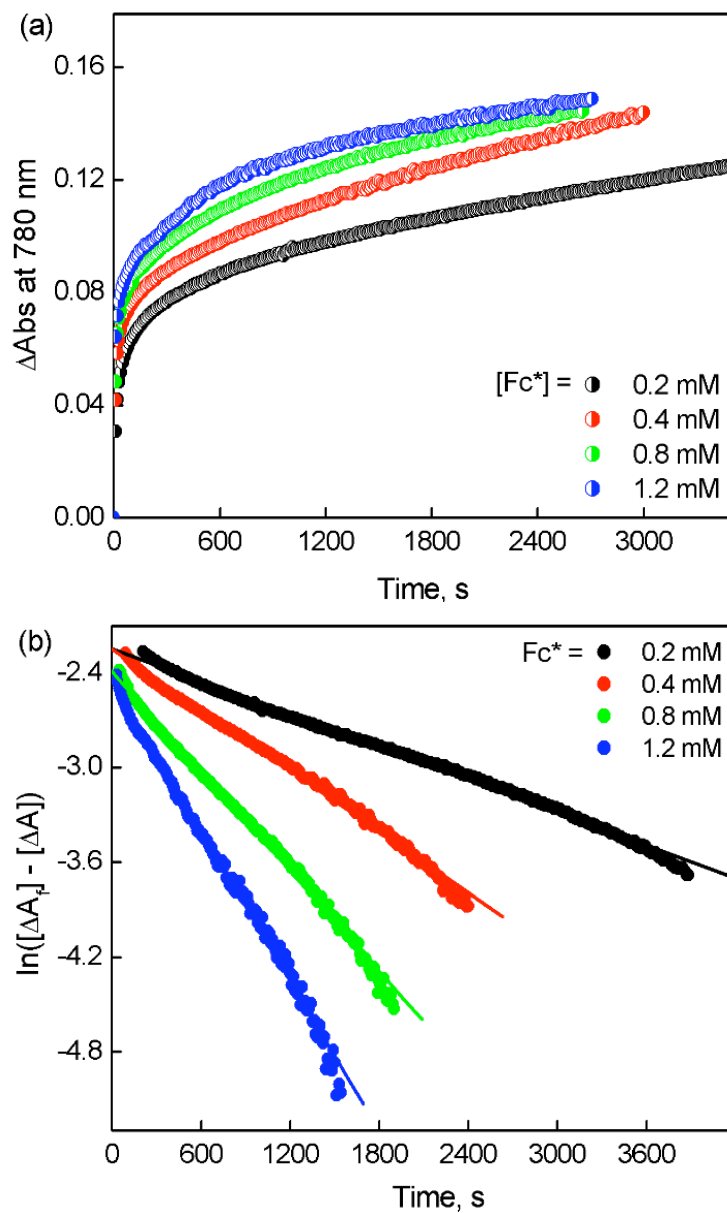

**Figure S13.** (a) Time profiles of the absorbance at 780 nm due to  $\text{Fc}^{*+}$  and (b) first-order plots of second electron transfer from  $\text{Fc}^*$  (0.20 mM (black), 0.40 mM (red), 0.80 mM (green) and 1.2 mM (blue)) to  $\text{D1}$  (0.10 mM) in the presence of HOTF (3.0 mM) in acetone at 213 K.

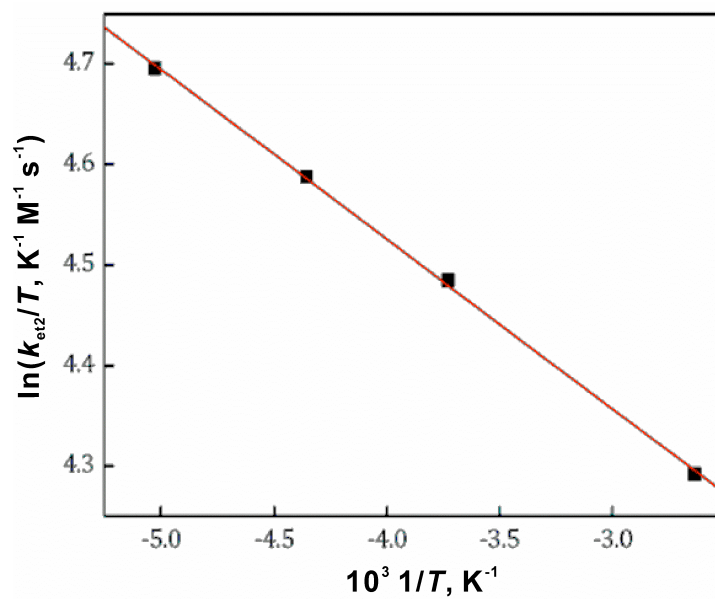

**Figure S14.** Eyring plot,  $\ln(k_{et2}/T)$  vs  $1/T$ , of the rate constants ( $k_{et2}$ ) of electron transfer from  $\text{Fc}^*$  to **D2** in acetone.
